# Supplementary material
Source: MDPI journal article supplement (https://www.mdpi.com/2311-7524/7/9/309)
Supplement: s1 [file s1]

## Article

# Supplementary Materials: Extending Shelf Life and Maintaining Quality of Tomato Fruit by Calcium Chloride, Hydrogen Peroxide, Chitosan, and Ozonated Water

Said A. Shehata <sup>1</sup>, Said Z. Abdelrahman <sup>2</sup>, Mona M. A. Megahed <sup>3</sup>, Emad A. Abdeldaym <sup>1</sup>, Mohamed M. El-Mogy <sup>1</sup>, Karima F. Abdelgawad <sup>1,\*</sup>

**Table S1.** Effect of treatments, storage period, and their interactions on physical and chemical parameters.

| Weight loss (%)                | 0 + 2           | 7 + 2           | 14 + 2           | 21 + 2           | 28 + 2           | Average  |
|--------------------------------|-----------------|-----------------|------------------|------------------|------------------|----------|
| Chitosan                       | 0.02 ± 0.009 j  | 0.16 ± 0.017 j  | 3.8 ± 0.044 ij   | 12.9 ± 0.021fg   | 20 ± 0.015 de    | 7.376 d  |
| Calcium chloride               | 0.18 ± 0.022 j  | 0.6 ± 0.077 j   | 4.6 ± 0.073 ij   | 10.2 ± 0.035 fg  | 22.6 ± 0.60 bc   | 7.636 d  |
| Hydrogen peroxide              | 0.41 ± 0.845 j  | 0.65 ± 0.929 j  | 5.6 ± 0.872 i    | 16.2 ± 0.657 ef  | 26.5 ± 1.054 bc  | 9.872 c  |
| Ozonated water                 | 0.41 ± 1.514 j  | 0.8 ± 1.681 j   | 7.5 ± 1.642 hi   | 20.2 ± 2.599 d   | 28.2 ± 1.66 b    | 11.422 b |
| Control                        | 0.67 ± 0.721 j  | 4 ± 1.856 ij    | 11.2 ± 0.289 gh  | 23.9 ± 2.315 cd  | 33.2 ± 1.53 a    | 14.594 a |
| Average                        | 0.338 e         | 1.242 d         | 6.54 c           | 16.68 b          | 26.1 a           |          |
| Firmness (kg/cm <sup>2</sup> ) | 0 + 2           | 7 + 2           | 14 + 2           | 21 + 2           | 28 + 2           | Average  |
| Chitosan                       | 5.5 ± 0.057 a–c | 5.3 ± 0.088 b–e | 4.5 ± 0.115 f–h  | 3.9 ± 0.057 jk   | 3.8 ± 0.088 kl   | 4.6 b    |
| Calcium chloride               | 5.9 ± 0.176 a   | 5.6 ± 0.088 ab  | 4.9 ± 0.152 d–f  | 4.3 ± 0.033 h–j  | 4.1 ± 0.145 h–j  | 4.96 a   |
| Hydrogen peroxide              | 5.7 ± 0.088 ab  | 5.6 ± 0.208 ab  | 4.2 ± 0.033 h–k  | 3.9 ± 0.103 jk   | 3.3 ± 0.218 m    | 4.54 b   |
| Ozonated water                 | 5.3 ± 0.24 b–e  | 5.1 ± 0.145 c–e | 3.8 ± 0.152 kl   | 3.1 ± 0.26 mn    | 2.7 ± 0.202 no   | 4.0 c    |
| Control                        | 4.8 ± 0.202 e–g | 4.6 ± 0.233 f–h | 3.4 ± 0.151 lm   | 3.1 ± 0.284 mn   | 2.3 ± 0.120 o    | 3.64 d   |
| Average                        | 5.44 a          | 5.24 a          | 4.16 b           | 3.66 c           | 3.24 c           |          |
| TSS (°Brix)                    | 0 + 2           | 7 + 2           | 14 + 2           | 21 + 2           | 28 + 2           | Average  |
| Chitosan                       | 3.7 ± 0.058 i   | 5.7 ± 0.088 a–d | 5.9 ± 0.176 ab   | 6.1 ± 0.102 a    | 5.4 ± 0.033 cd   | 5.36 a   |
| Calcium chloride               | 3.6 ± 0.019 i   | 4.8 ± 0.463 e–h | 5.3 ± 0.454 c–e  | 5.9 ± 0.318 ab   | 5.1 ± 0.273 d–f  | 4.94 b   |
| Hydrogen peroxide              | 3.6 ± 0.029 i   | 4.6 ± 0.163 f–h | 5.1 ± 0.203 d–f  | 5.8 ± 0.088 ab   | 4.6 ± 0.120 f–h  | 4.74 b   |
| Ozonated water                 | 3.4 ± 0.059 i–k | 4.5 ± 0.098 f–h | 4.9 ± 0.090 e–h  | 4.5 ± 0.067 f–h  | 3.1 ± 0.139 jk   | 4.08 c   |
| Control                        | 3.4 ± 0.119 i–k | 4.4 ± 0.236 h   | 4.4 ± 0.143 gh   | 3.9 ± 0.208 hi   | 3 ± 0.525 k      | 3.82 d   |
| Average                        | 3.54 d          | 4.8 b           | 5.12 a           | 5.24 a           | 4.24 c           |          |
| L* value                       | 0 + 2           | 7 + 2           | 14 + 2           | 21 + 2           | 28 + 2           | Average  |
| Chitosan                       | 50.2 ± 0.809 a  | 45.1 ± 0.674 b  | 40.7 ± 0.684 d–f | 36.8 ± 0.395 g–i | 36.5 ± 1.453 g–j | 41.86 a  |

|                                |                  |                  |                  |                  |                  |                |
|--------------------------------|------------------|------------------|------------------|------------------|------------------|----------------|
| Calcium chloride               | 45 ± 0.839 b     | 40.7 ± 1.619 d–f | 39.2 ± 0.980 e–g | 34.2 ± 1.019 h–k | 32.8 ± 1.349 kl  | 38.38 b        |
| Hydrogen peroxide              | 43.9 ± 1.635 bc  | 41.3 ± 1.055 c–e | 36.6 ± 1.05 g–j  | 34.5 ± 0.855 h–k | 32.9 ± 0.282 kl  | 37.84 b        |
| Ozonated water                 | 43.2 ± 0.519 bc  | 37.2 ± 1.22 gh   | 33.7 ± 0.90 i–l  | 32.4 ± 2.052 kl  | 31.2 ± 0.552 l   | 35.54 c        |
| Control                        | 44.6 ± 0.674 b   | 41.3 ± 0.37 c–e  | 38 ± 0.945 fg    | 32.7 ± 1.071 kl  | 31.5 ± 1.00 l    | 37.62 b        |
| Average                        | 45.38 a          | 41.12 b          | 37.64 c          | 34.12 d          | 32.98 d          |                |
| <b>a* value</b>                | <b>0 + 2</b>     | <b>7 + 2</b>     | <b>14 + 2</b>    | <b>21 + 2</b>    | <b>28 + 2</b>    | <b>Average</b> |
| Chitosan                       | 5.5 ± 0.730 q    | 7.5 ± 0.643 pq   | 14.4 ± 1.30 l–n  | 16.2 ± 0.751 j–l | 24.6 ± 1.73 d–g  | 13.64 d        |
| Calcium chloride               | 8.7 ± 1.01 o–q   | 14.5 ± 1.23 l–n  | 16.5 ± 0.69 j–l  | 18.5 ± 1.56 i–k  | 27.9 ± 1.96 b–d  | 17.22 c        |
| Hydrogen peroxide              | 10.5 ± 1.914 n–p | 19.9 ± 1.50 h–j  | 22.6 ± 2.05 f–h  | 25.1 ± 1.409 d–f | 30.2 ± 0.527 bc  | 21.66 b        |
| Ozonated water                 | 13.5 ± 1.728 l–n | 21.1 ± 2.08 g–i  | 23.2 ± 0.84 e–h  | 25.8 ± 1.650 d–f | 30.9 ± 0.677 b   | 22.9 b         |
| control                        | 12.1 ± 1.26 m–o  | 25.9 ± 1.09 d–f  | 26.4 ± 0.876 c–e | 28.1 ± 1.06 b–d  | 35.6 ± 1.33 a    | 25.62 a        |
| Average                        | 10.06 d          | 17.78 c          | 20.62 b          | 22.74 b          | 29.84 a          |                |
| <b>b* value</b>                | <b>0 + 2</b>     | <b>7 + 2</b>     | <b>14 + 2</b>    | <b>21 + 2</b>    | <b>28 + 2</b>    | <b>Average</b> |
| Chitosan                       | 35.8 ± 1.93 a    | 32.2 ± 2.0 a–c   | 30.1 ± 0.147 b–d | 24.4 ± 0.085 gh  | 22.1 ± 0.542 hi  | 28.92 a        |
| Calcium chloride               | 30.5 ± 0.313 g–i | 26.6 ± 3.4 d–g   | 24.1 ± 1.219 g–i | 23.8 ± 1.478 g–i | 24.1 ± 0.674 g–i | 25.82 bc       |
| Hydrogen peroxide              | 29.8 ± 1.27 b–d  | 29.6 ± 1.56 b–d  | 23.8 ± 1.295 g–i | 23.2 ± 1.283 g–i | 21.3 ± 1.55 hi   | 25.54 bc       |
| Ozonated water                 | 29.5 ± 1.11 b–d  | 25.3 ± 0.90 e–h  | 24.8 ± 0.113 gh  | 22.5 ± 2.142 hi  | 21.3 ± 1.20 hi   | 24.68 c        |
| Control                        | 30.2 ± 0.49 b–d  | 29.1 ± 0.10 b–e  | 28.5 ± 0.60 c–f  | 23.9 ± 0.462 g–i | 20.1 ± 0.80 i    | 26.36 b        |
| Average                        | 31.16 a          | 28.56 b          | 26.26 b          | 23.56 c          | 21.78 c          |                |
| <b>CI</b>                      | <b>0 + 2</b>     | <b>7 + 2</b>     | <b>14 + 2</b>    | <b>21 + 2</b>    | <b>28 + 2</b>    | <b>Average</b> |
| Chitosan                       | 6.0 ± 0.846 j    | 10.1 ± 1.23 i    | 21.2 ± 1.45 g–i  | 30.1 ± 0.84 d–f  | 40.8 ± 3.0 bc    | 21.6 d         |
| Calcium chloride               | 12.2 ± 1.765 i   | 23.5 ± 3.78 f–h  | 28.8 ± 1.48 e–g  | 35.9 ± 2.57 cd   | 46.1 ± 1.95 b    | 29.3 c         |
| Hydrogen peroxide              | 15.1 ± 3.38 i    | 27 ± 4.14 d–g    | 37.6 ± 2.9 cd    | 42.6 ± 1.49 bc   | 49.7 ± 0.89 b    | 34.4 b         |
| Ozonated water                 | 19.3 ± 2.68 hi   | 34.4 ± 3.96 cd   | 40.5 ± 0.89 bc   | 46.5 ± 2.65 b    | 52.8 ± 0.317 a   | 38.7 a         |
| Control                        | 16.7 ± 1.44 hi   | 32.3 ± 0.68 de   | 35.8 ± 1.85 cd   | 46.6 ± 1.71 b    | 55.3 ± 0.84 a    | 37.3 a         |
| Average                        | 13.9 e           | 25.4 d           | 32.8 c           | 40.3 b           | 48.9 a           |                |
| <b>Titrateable acidity (%)</b> | <b>0 + 2</b>     | <b>7 + 2</b>     | <b>14 + 2</b>    | <b>21 + 2</b>    | <b>28 + 2</b>    | <b>Average</b> |
| Chitosan                       | 0.48 ± 0.024 k–n | 0.55 ± 0.018 f–k | 0.69 ± 0.003 bc  | 0.79 ± 0.002 a   | 0.65 ± 0.006 cd  | 0.632 a        |
| Calcium chloride               | 0.46 ± 0.035 l–n | 0.52 ± 0.61 i–m  | 0.63 ± 0.007 c–e | 0.73 ± 0.013 ab  | 0.56 ± 0.006 e–j | 0.58 b         |
| Hydrogen peroxide              | 0.43 ± 0.039 n   | 0.51 ± 0.009 i–m | 0.61 ± 0.036 d–g | 0.63 ± 0.022 c–f | 0.49 ± 0.031 j–n | 0.534 c        |

|                              |                   |                   |                   |                   |                   |                |
|------------------------------|-------------------|-------------------|-------------------|-------------------|-------------------|----------------|
| Ozonated water               | 0.43 ± 0.011 n    | 0.53 ± 0.013 h–l  | 0.57 ± 0.014 e–i  | 0.60 ± 0.011 d–h  | 0.53 ± 0.024 h–l  | 0.532 c        |
| Control                      | 0.42 ± 0.014 n    | 0.52 ± 0.023 i–m  | 0.57 ± 0.029 e–i  | 0.55 ± 0.013 g–k  | 0.45 ± 0.023 mn   | 0.502 c        |
| Average                      | 0.444 d           | 0.526 c           | 0.614 b           | 0.66 a            | 0.536 c           |                |
| <b>Ascorbic acid (mg/g)</b>  | <b>0 + 2</b>      | <b>7 + 2</b>      | <b>14 + 2</b>     | <b>21 + 2</b>     | <b>28 + 2</b>     | <b>Average</b> |
| Chitosan                     | 0.248 ± 0.019 a   | 0.229 ± 0.02 b    | 0.212 ± 0.004 c   | 0.200 ± 0.003 cd  | 0.177 ± 0.005 h–l | 0.2132 a       |
| Calcium chloride             | 0.199 ± 0.006 c–e | 0.197 ± 0.002 c–f | 0.190 ± 0.002 d–h | 0.186 ± 0.001 e–i | 0.166 ± 0.006 k–o | 0.1876 b       |
| Hydrogen peroxide            | 0.192 ± 0.006 d–h | 0.191 ± 0.001 d–g | 0.183 ± 0.003 f–j | 0.169 ± 0.004 j–n | 0.164 ± 0.003 l–o | 0.1798 c       |
| Ozonated water               | 0.194 ± 0.002 d–g | 0.189 ± 0.001 g–k | 0.173 ± 0.003 i–m | 0.159 ± 0.002 m–o | 0.156 ± 0.005 no  | 0.1742 d       |
| Control                      | 0.198 ± 0.002 c–e | 0.188 ± 0.007 d–h | 0.172 ± 0.005 i–m | 0.157 ± 0.001 no  | 0.152 ± 0.003 o   | 0.1734 d       |
| Average                      | 0.2062 a          | 0.1988 b          | 0.186 c           | 0.1742 d          | 0.163 e           |                |
| <b>Lycopene (mg/g)</b>       | <b>0 + 2</b>      | <b>7 + 2</b>      | <b>14 + 2</b>     | <b>21 + 2</b>     | <b>28 + 2</b>     | <b>Average</b> |
| Chitosan                     | 0.04 ± 0.007 o    | 0.05 ± 0.008 no   | 0.06 ± 0.003 mn   | 0.07 ± 0.002 l    | 0.17 ± 0.017 de   | 0.078 d        |
| Calcium chloride             | 0.07 ± 0.010 lm   | 0.08 ± 0.006 kl   | 0.10 ± 0.002 ij   | 0.12 ± 0.001 gh   | 0.18 ± 0.002 cd   | 0.11 c         |
| Hydrogen peroxide            | 0.07 ± 0.010 lm   | 0.08 ± 0.015 kl   | 0.11 ± 0.006 hi   | 0.13 ± 0.001 fg   | 0.17 ± 0.001 de   | 0.112 c        |
| Ozonated water               | 0.08 ± 0.009 kl   | 0.09 ± 0.014 jk   | 0.14 ± 0.007 f    | 0.16 ± 0.002 e    | 0.22 ± 0.007 b    | 0.138 b        |
| Control                      | 0.10 ± 0.008 ij   | 0.13 ± 0.017 fg   | 0.16 ± 0.011 e    | 0.19 ± 0.018 c    | 0.34 ± 0.023 a    | 0.184 a        |
| Average                      | 0.072 d           | 0.086 d           | 0.114 c           | 0.134 b           | 0.216 a           |                |
| <b>Total sugar (mg/100g)</b> | <b>0 + 2</b>      | <b>7 + 2</b>      | <b>14 + 2</b>     | <b>21 + 2</b>     | <b>28 + 2</b>     | <b>Average</b> |
| Chitosan                     | 0.71 ± 0.025 k–m  | 1.4 ± 0.021h      | 3.6 ± 0.021 a     | 3.6 ± 0.012 a     | 2.8 ± 0.009 cd    | 2.422 a        |
| Calcium chloride             | 0.63 ± 0.005 lm   | 1.3 ± 0.018 hi    | 3.4 ± 0.131 a     | 3.1 ± 0.032 b     | 2.5 ± 0.028 e     | 2.186 b        |
| Hydrogen peroxide            | 0.62 ± 0.021 lm   | 1.1 ± 0.055 ij    | 3.1 ± 0.009 b     | 2.7 ± 0.135 de    | 2.2 ± 0.002 fg    | 1.944 c        |
| Ozonated water               | 0.56 ± 0.102 m    | 0.95 ± 0.172 jk   | 2.8 ± 0.166 cd    | 2.5 ± 0.242 e     | 1.6 ± 0.161 h     | 1.682 d        |
| Control                      | 0.54 ± 0.115 m    | 0.91 ± 0.052 j–l  | 2.4 ± 0.004 ef    | 2 ± 0.086 fg      | 1.1 ± 0.070 ij    | 1.39 e         |
| Average                      | 0.612 e           | 1.132 d           | 3.06 a            | 2.78 b            | 2.04 c            |                |
